# Supplementary material
Source: MDPI journal article supplement (https://www.mdpi.com/2673-4591/10/1/30)
Supplement: s1 [file s1]

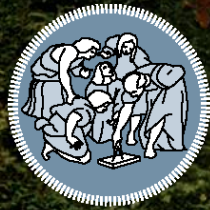

**POLITECNICO**  
MILANO 1863

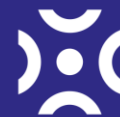

Université  
Gustave  
Eiffel

**ESIÉE**  
PARIS

# Towards a multi-interdigital transducer configuration to combine focusing and trapping of microparticles within a microfluidic platform: a 3D numerical analysis

Gianluca Mezzanzanica<sup>1</sup>, Olivier Français<sup>2</sup>

<sup>1</sup> Department of Civil and Environmental Engineering (DICA), Politecnico di Milano, Italy; gianluca.mezzanzanica@mail.polimi.it

<sup>2</sup> ESYCOM Lab, Université Gustave Eiffel, CNRS, F-77454, Marne-la-Vallée, France; olivier.francais@esiee.fr

## Background:

- Microfluidics and Lab-On-a-Chip (LOC) devices.
- Acoustic manipulation of microparticles through acoustophoresis.
- Surface acoustic waves (SAW)-based devices.

## Aim:

- Analysis of a multi-interdigital transducer configuration to achieve a versatile and efficient acoustic manipulation of particles.

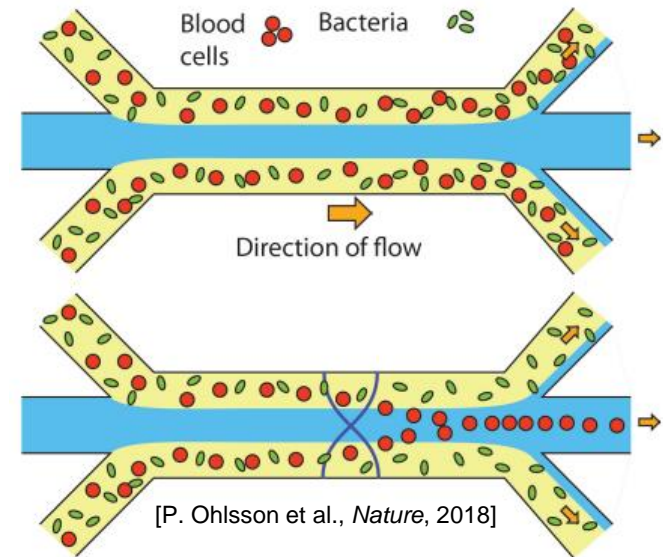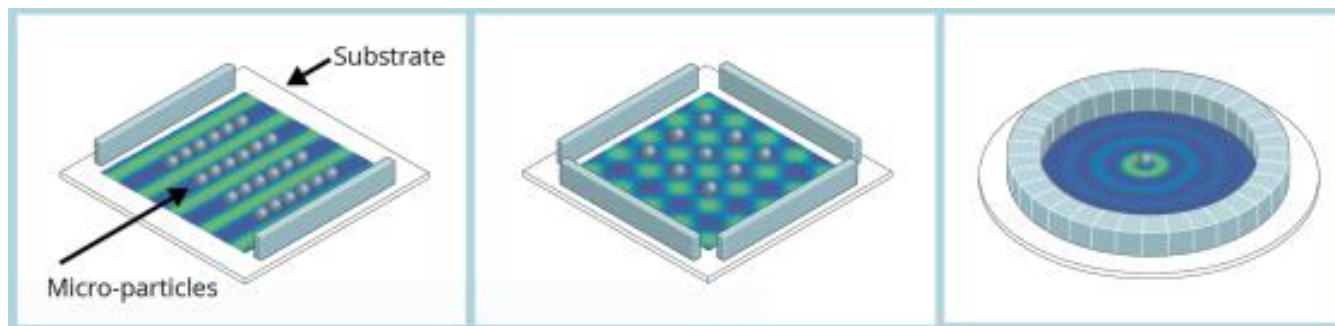

[B.W. Drinkwater, *Lab on a chip*, 2016]

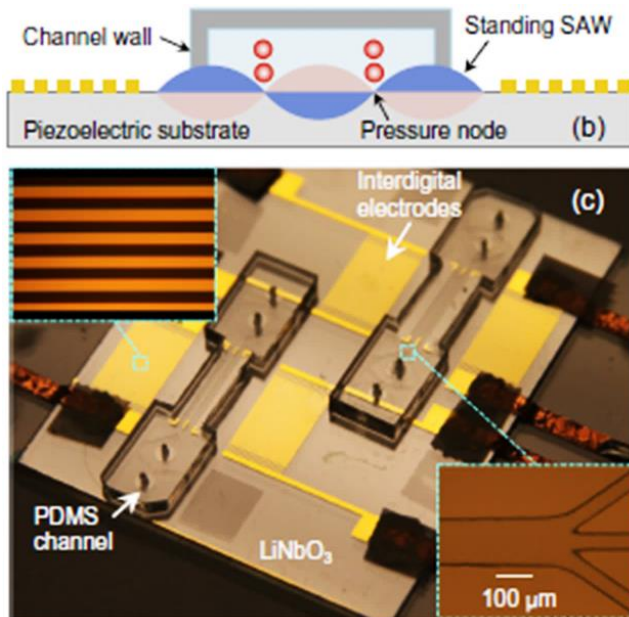

[J. Guo et al., *Journal of Colloidal and Interface Science*, 2015]

## Device functioning:

- AC voltage signal applied to IDTs deposited on the surface of a piezoelectric substrate;
- Converse piezoelectric effect generates travelling SAWs (TSAWs) on the surface of the substrate;
- Two or more counter-propagating waves interact developing a standing SAW (SSAW);
- The SSAW is transmitted to the fluid contained in a microchannel, in form of pressure waves;
- The standing pressure field can be exploited for acoustic manipulation of microparticles dispersed in the fluid.

# Two-IDTs configuration

## Model:

- Piezoelectric effect: coupling between mechanics and electrostatics (piezoelectric constitutive law).
- Acoustic pressure field: Helmholtz wave equation.
- Forces acting on particles: acoustic radiation force and fluid drag force.

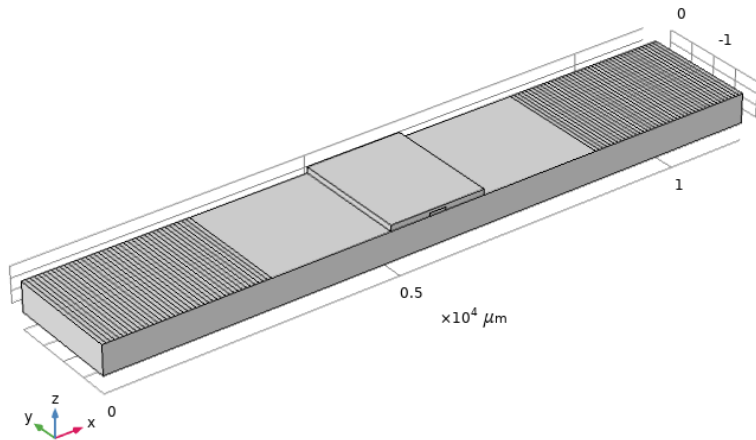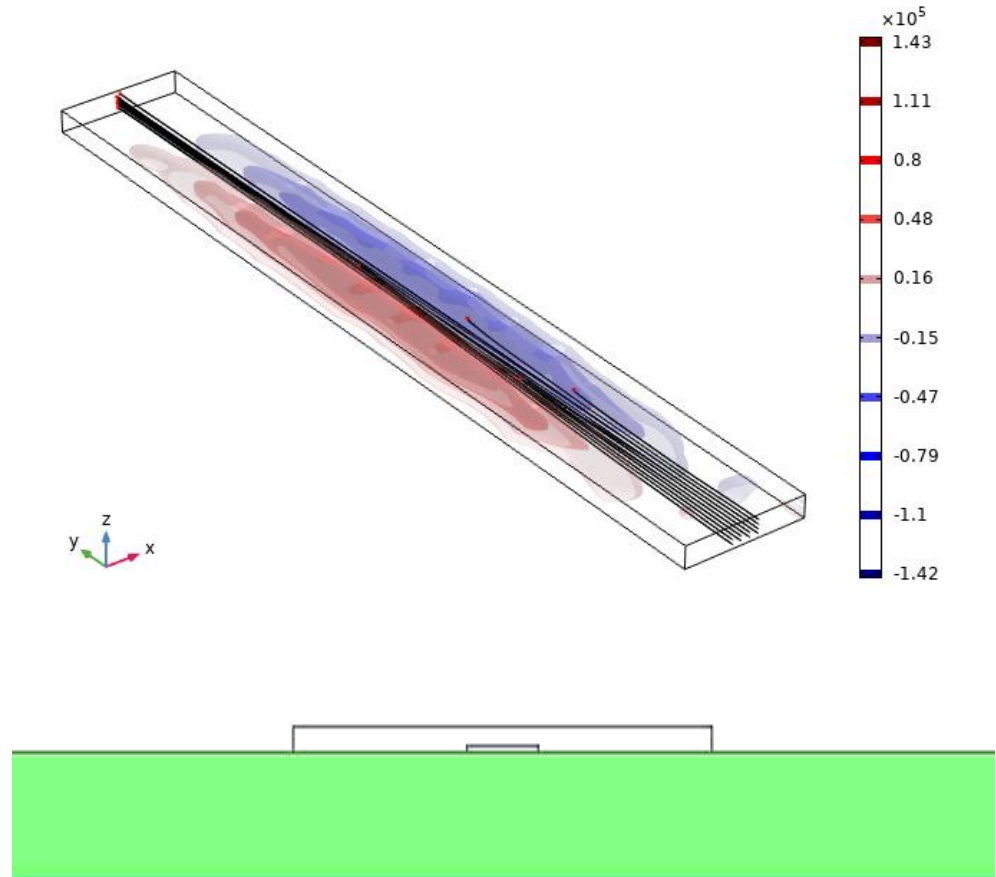

# Multi-IDTs configuration - Geometry

|                  | LiNbO <sub>3</sub> Substrate | PDMS Channel | Water Channel | PDMS Chamber | Water Chamber |
|------------------|------------------------------|--------------|---------------|--------------|---------------|
| <b>Width</b>     | 8627μm                       | 1650μm       | 280μm         | 1650μm       | 1400μm        |
| <b>Length</b>    | 8627μm                       | 8627μm       | 8627μm        | 1650μm       | 1400μm        |
| <b>Thickness</b> | 500μm                        | 100μm        | 50μm          | 100μm        | 50μm          |

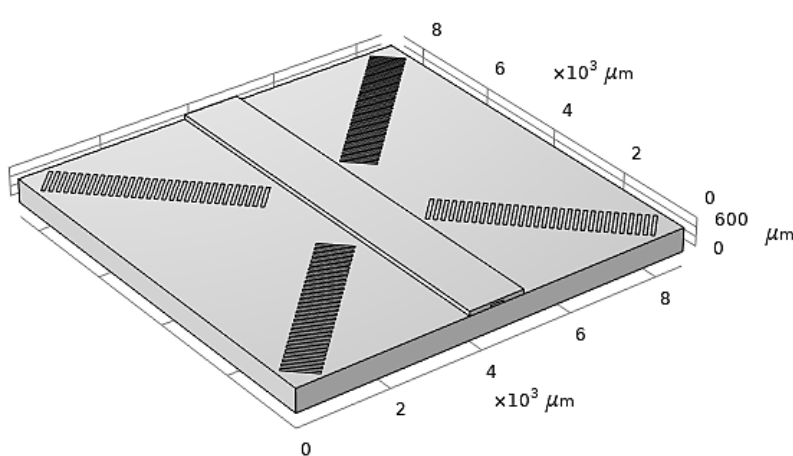

PDMS Microchannel

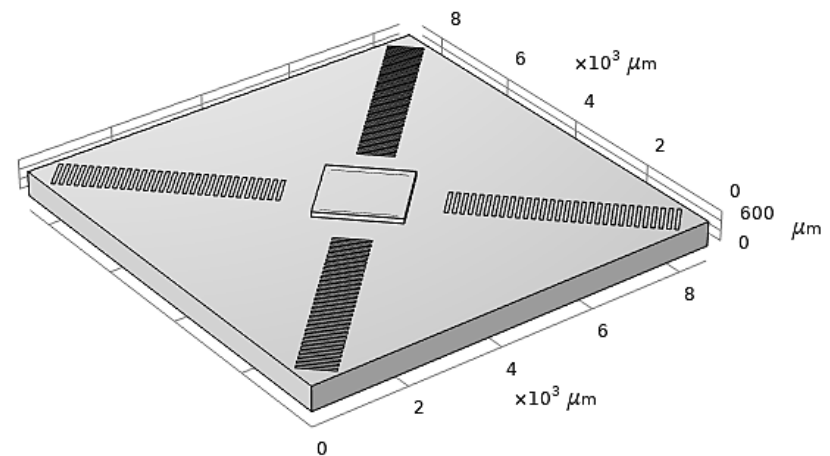

PDMS Chamber

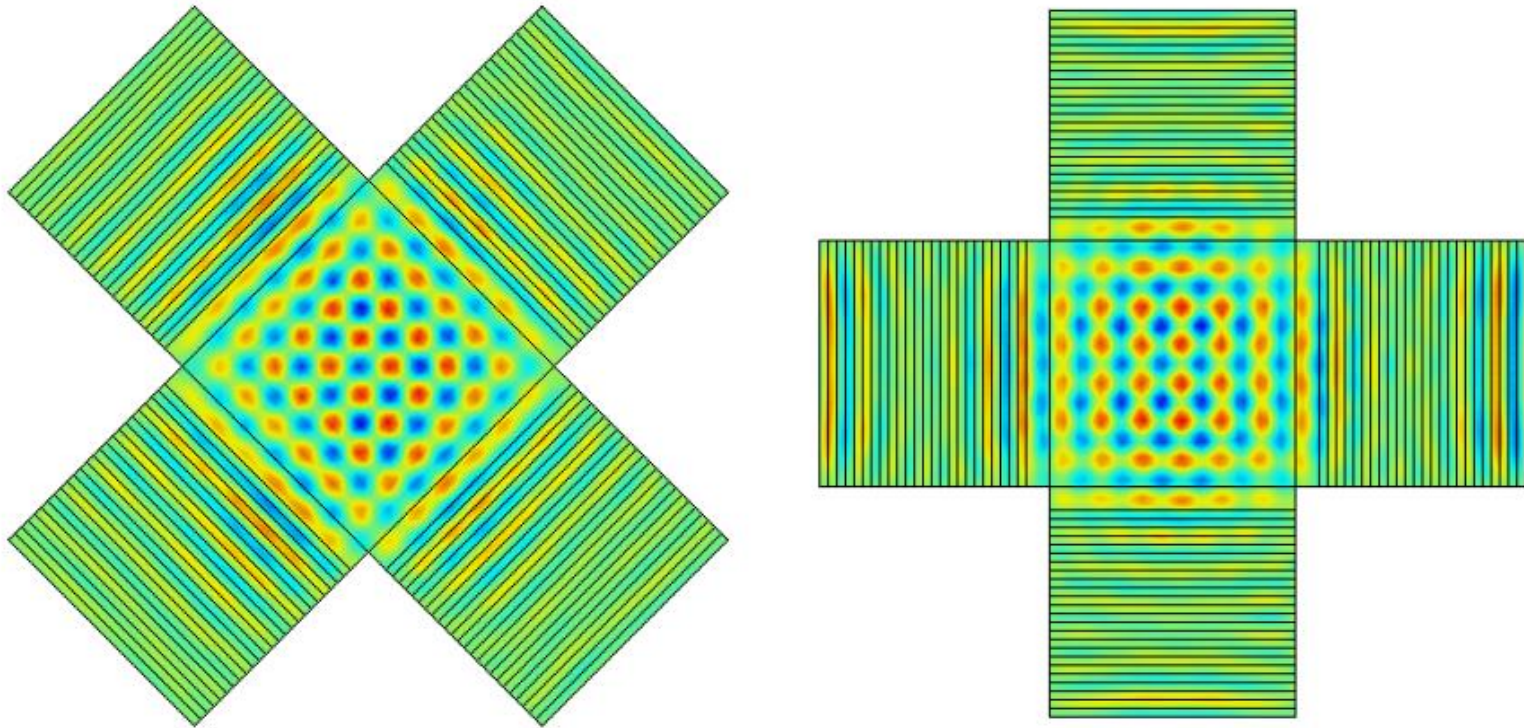

SSAW distribution caused by four TSAWs interacting.

# Multi-IDTs configuration – Standing pressure field

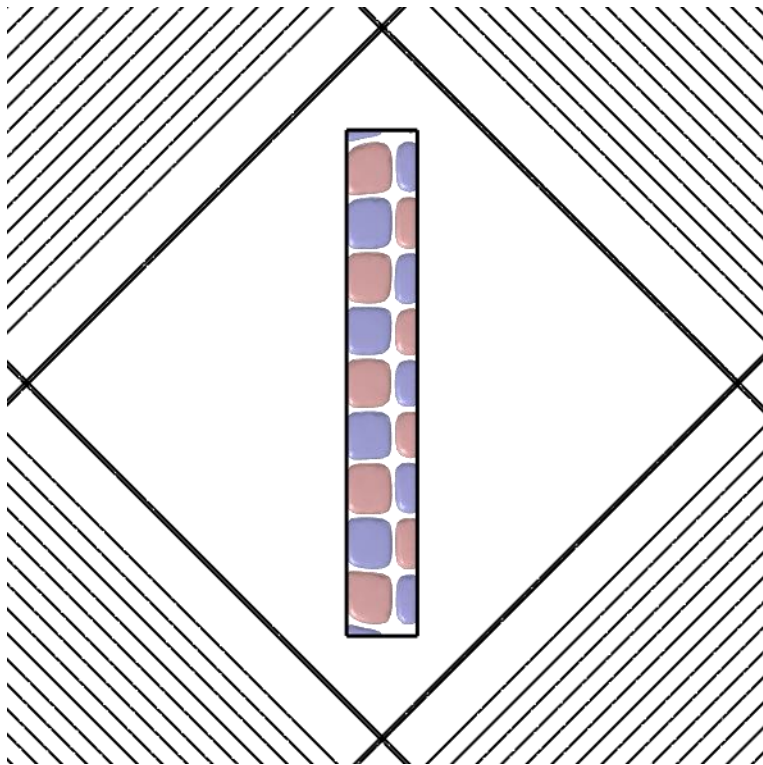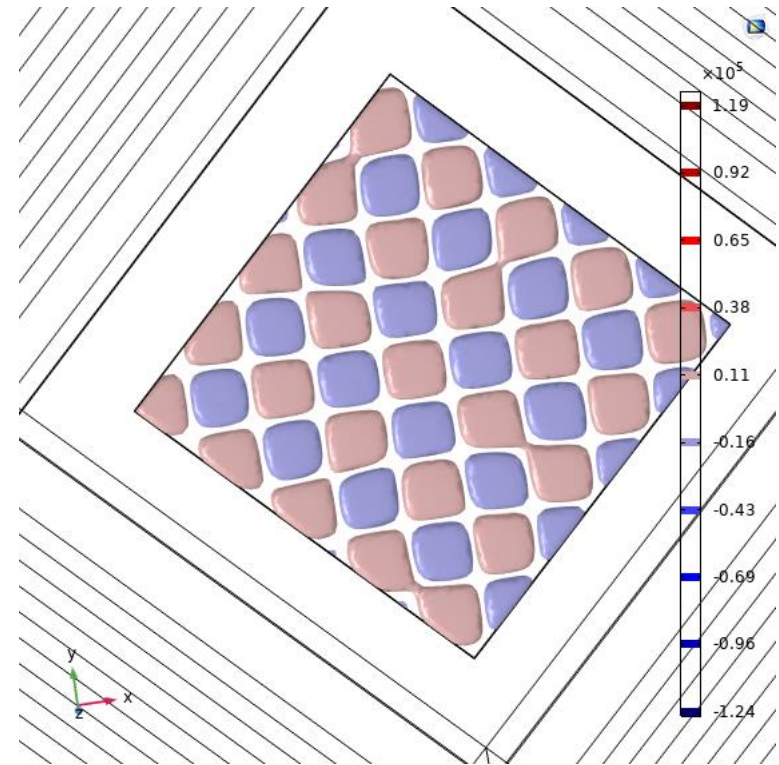

Standing pressure field within the fluid domain contained in the PDMS structures.

# Multi-IDTs configuration - Focusing

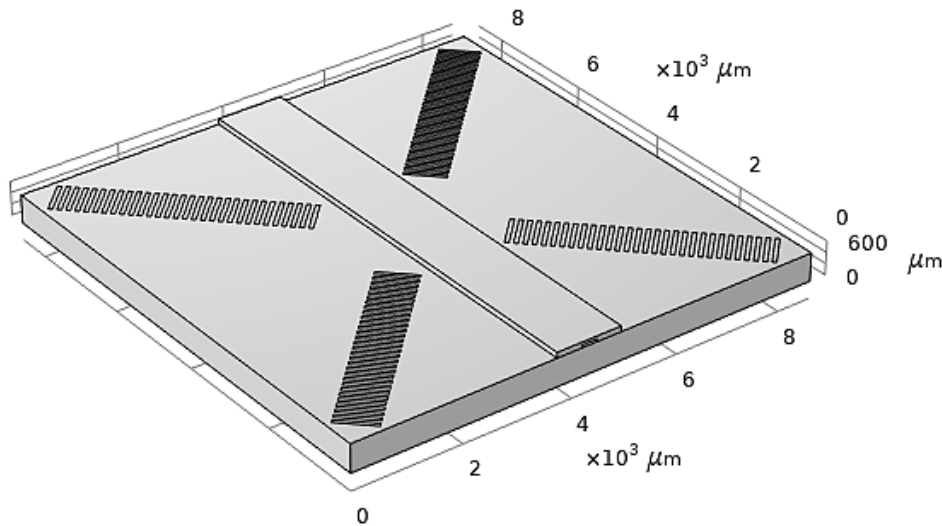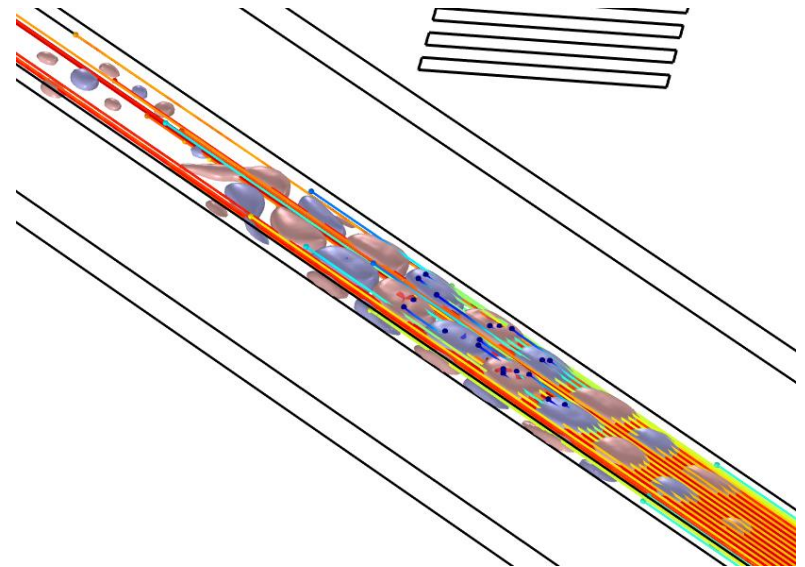

Particles focused on the two pressure nodes.



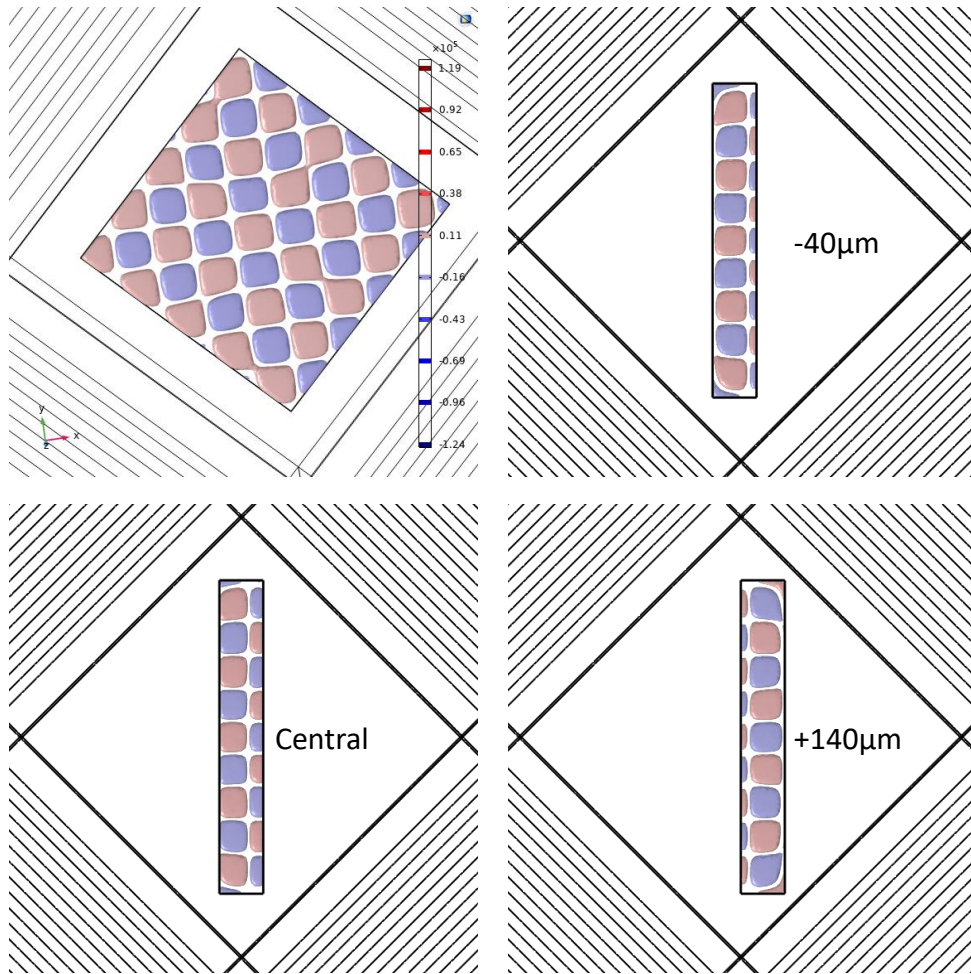

## Versatility of the configuration:

- Design of the microstructure to generate a specific standing pressure field within the fluid domain (change position of the pressure nodes).
- Disposable PDMS microchannels can be used.

# Multi-IDTs configuration – Trapping

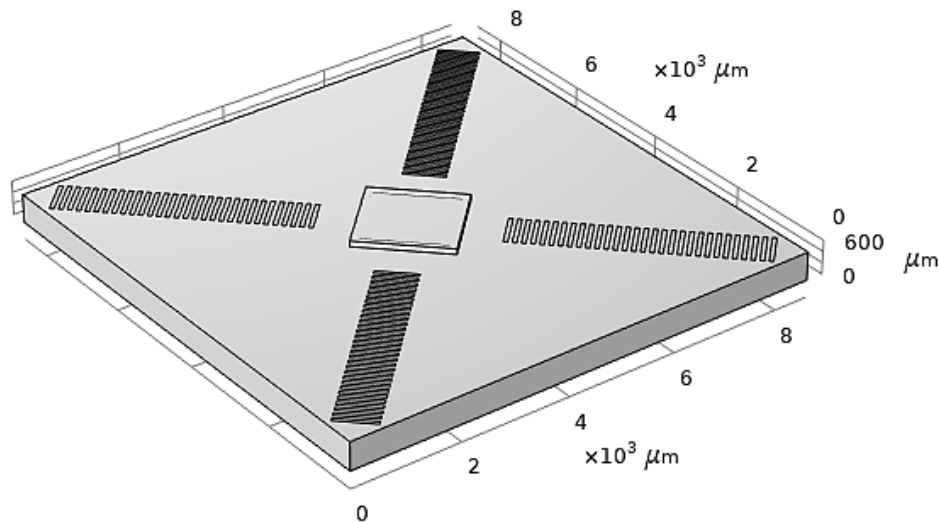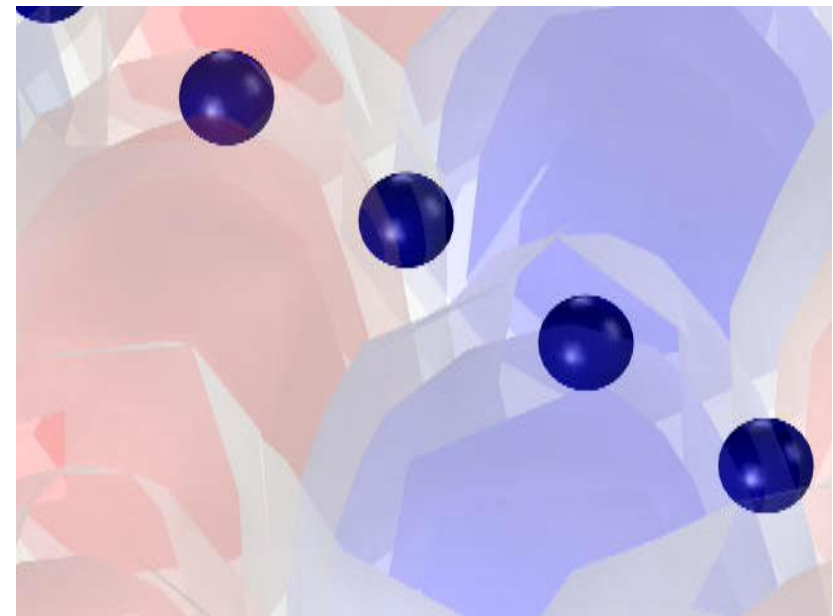

One particle is trapped within the pressure node.

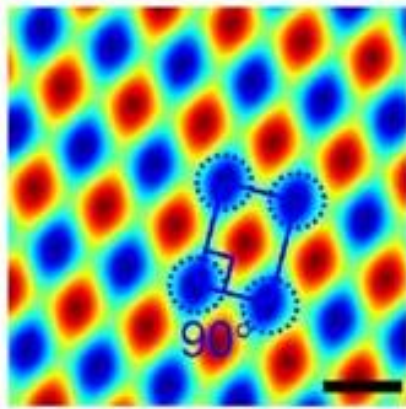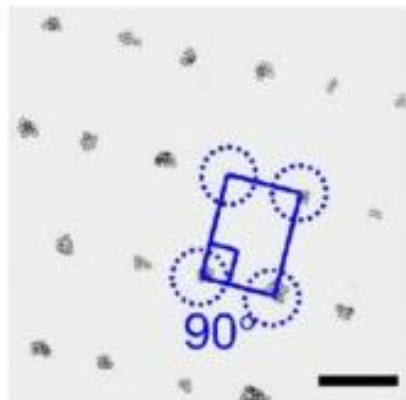

[Tian et al., *Sci. Adv.*, 2019]

## Conclusions:

- Low-cost fabrication;
- Easy integration in Lab-On-a-Chip devices;
- Microparticle focusing, sorting and trapping can be achieved;
- Versatility of the platform depending on the design of the microchannels;
- Applications towards biological cell sorting, isolation, and assembling can be considered based on this principle.

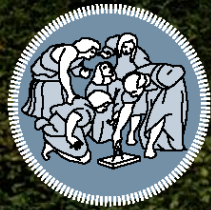

**POLITECNICO**  
MILANO 1863

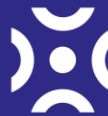

Université  
Gustave  
Eiffel

**ESIÉE**  
PARIS

Thank you for your attention!

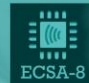

The 8th International Electronic Conference on  
Sensors and Applications  
01-15 NOVEMBER 2021 | ONLINE

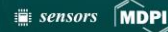

Gianluca Mezzanzanica<sup>1</sup>, Olivier Français<sup>2</sup>

<sup>1</sup> Department of Civil and Environmental Engineering (DICA), Politecnico di Milano, Italy; gianluca.mezzanzanica@mail.polimi.it

<sup>2</sup> ESYCOM Lab, Université Gustave Eiffel, CNRS, F-77454, Marne-la-Vallée, France; olivier.francais@esiee.fr
